# Supplementary material
Source: PubMed Central journal article supplement (PMC6116903)
Supplement: NIHMS981533-supplement-Sup.pdf [file NIHMS981533-supplement-Sup.pdf]

# Supporting information for

## Spatiotemporal Control of TGF- $\beta$ Signaling with Light

Yuchao Li<sup>1\*</sup>, Minji Lee<sup>2\*</sup>, Nury Kim<sup>4</sup>, Guoyu Wu<sup>1</sup>, Difan Deng<sup>1</sup>, Jin Man Kim<sup>2,#</sup>,  
Xuedong Liu<sup>3</sup>, Won Do Heo<sup>2,4,5†</sup>, Zhike Zi<sup>1†</sup>

<sup>1</sup>Otto-Warburg Laboratory, Max Planck Institute for Molecular Genetics, Berlin, 14195, Germany.

<sup>2</sup>Department of Biological Sciences, Korea Advanced Institute of Science and Technology, Daejeon 34141, Republic of Korea.

<sup>3</sup>Department of Chemistry and Biochemistry, University of Colorado Boulder, Boulder, CO 80309-0596, United States.

<sup>4</sup>Center for Cognition and Sociality, Institute for Basic Science (IBS), Daejeon 34141, Republic of Korea.

<sup>5</sup>KAIST Institute for the BioCentury, Korea Advanced Institute of Science and Technology, Daejeon 34141, Republic of Korea.

<sup>#</sup>Present Address: Department of Physiology, School of Dentistry, Seoul National University and Dental Research Institute, Seoul 03080, Republic of Korea.

\*These authors contributed equally to this work.

† Corresponding authors. Email: wondo@kaist.ac.kr, zhike.zi@molgen.mpg.de

## List of Supporting Information

Figure S1. Subcellular localization of mCerulean tagged Myr-cytT $\beta$ RI-CIBN protein in HeLa cells.

Figure S2. The expression of iRFP-Smad2, Myr-T $\beta$ RI-CIBN and cytT $\beta$ RII-PHR-tdTomato and proteins in the optoTGFBRs-HeLa cells.

Figure S3: The optoTGFBRs system can be activated by two-photon excitation.

Figure S4: The optoTGFBRs system can induce the expression of TGF- $\beta$  responsive genes.

Figure S5: Dynamics of Smad2 signaling to pulses of TGF- $\beta$  and blue light stimulations.

Movie S1. Sequential activation of optoTGFBRs-HeLa cells in single cells. Supplementary movie for Figure 6.

Movie S2. Activation of optoTGFBRs-HeLa cells with single pulse of light stimulation. Supplementary movie for Figure 7A.

Movie S3. Activation of optoTGFBRs-HeLa cells with repeated light pulses every 10 min. Supplementary movie for Figure 7B.

Movie S4. Activation of optoTGFBRs-HeLa cells with repeated light pulses every 3 hours. Supplementary movie for Figure 7C.

## Supplementary Figures

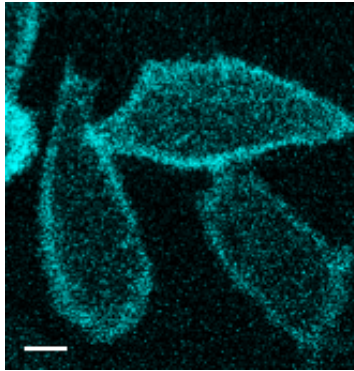

**Figure S1: Subcellular localization of mCerulean tagged Myr-cytT $\beta$ RI-CIBN protein in HeLa cells.** The expression of the membrane-anchored cytT $\beta$ RI protein fused with CIBN domain and mCerulean fluorescence tag (Myr-cytT $\beta$ RI-CIBN-mCer) shows the plasma membrane localization in HeLa cells. Scale bar: 10  $\mu$ m.

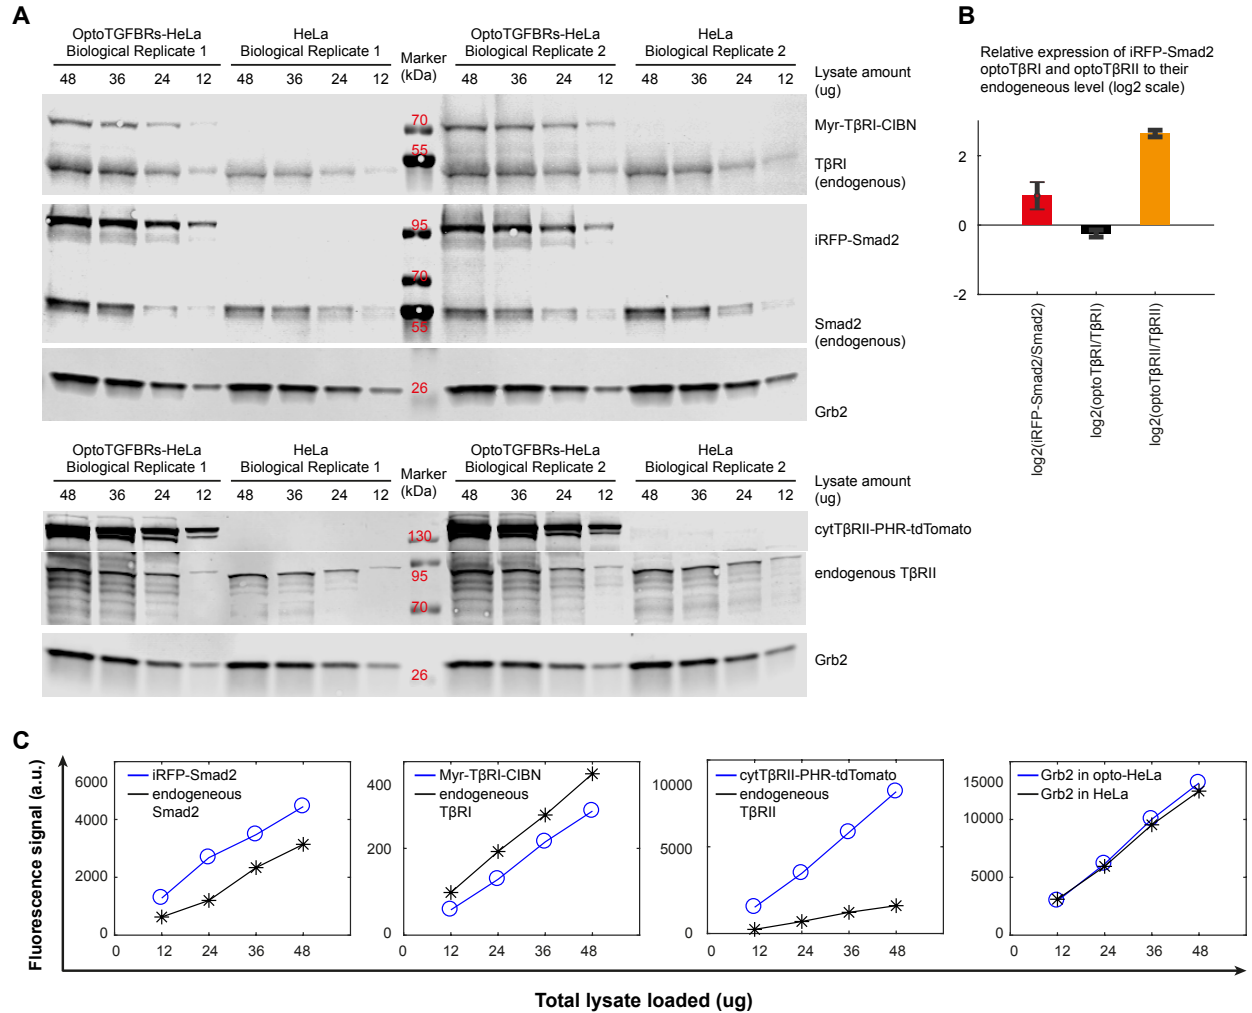

**Figure S2: The expression of iRFP-Smad2, Myr-TβRI-CIBN and cytTβRII-PHR-tdTomato proteins in the optoTGFBRs-HeLa cells.**

(A) Cell lysates were loaded at different amount to optimize the range where antibody signal is linear. (B) The relative expressions of iRFP-Smad2 to endogenous Smad2, optoTβRI to endogenous TβRI, and optoTβRII to endogenous TβRII were estimated from the average of two biological replicates. (C) The antibodies' fluorescence signal has a linear relationship with the amount of lysate loaded when measured with the LI-COR odyssey CLx imaging system.

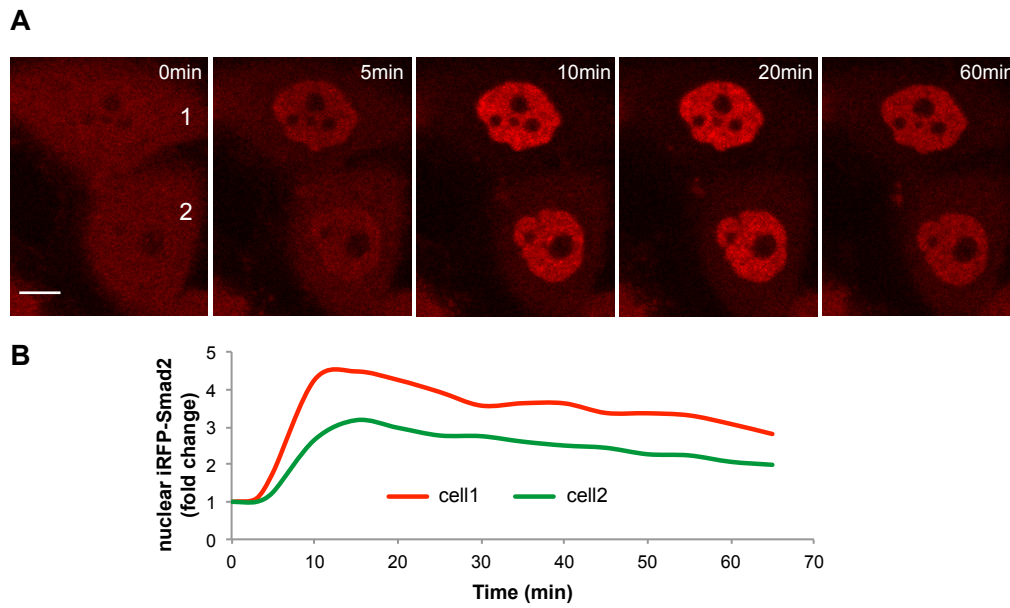

**Figure S3: The optoTGFBRs system can be activated by two-photon excitation.** (A) optoTGFBRs-HeLa cells were excited with two-photon illumination at 860 nm to induce translocation of iRFP-Smad2 to the nucleus. Scale bar: 10  $\mu$ m. (B) Quantification of nuclear Smad2 signaling dynamics shown in panel A.

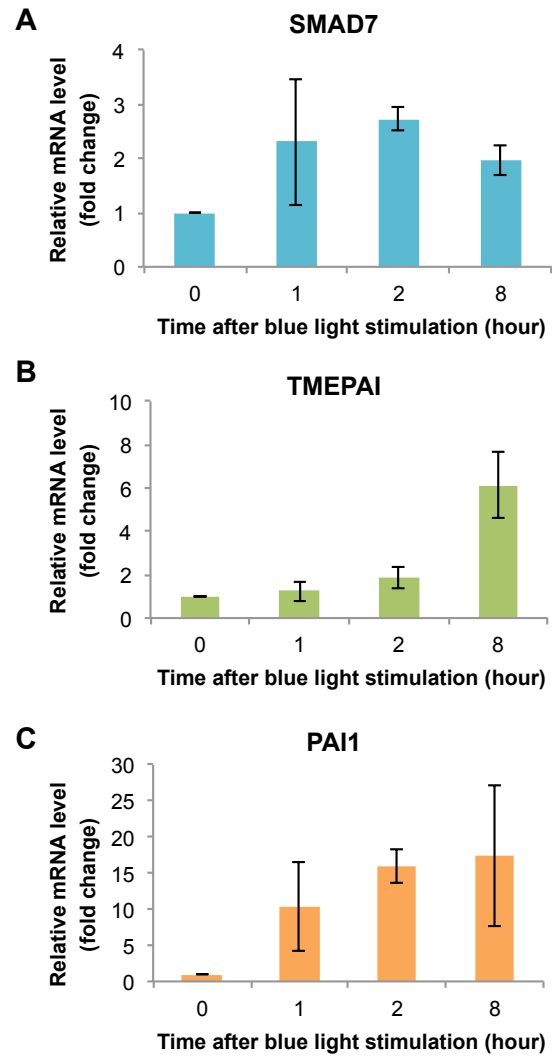

**Figure S4: The optoTGFBRs system can induce the expression of TGF- $\beta$  responsive genes.** Quantitative PCR assay for the expression of (A) Smad7, (B) TMEPAI and (C) PAI1 genes in the optoTGFBRs-HeLa cells at 0, 1, 2 and 8 hours after blue light illumination (488 nm, 4 mW/cm<sup>2</sup>) in LED box. The averages and standard deviations from three replicates are shown.

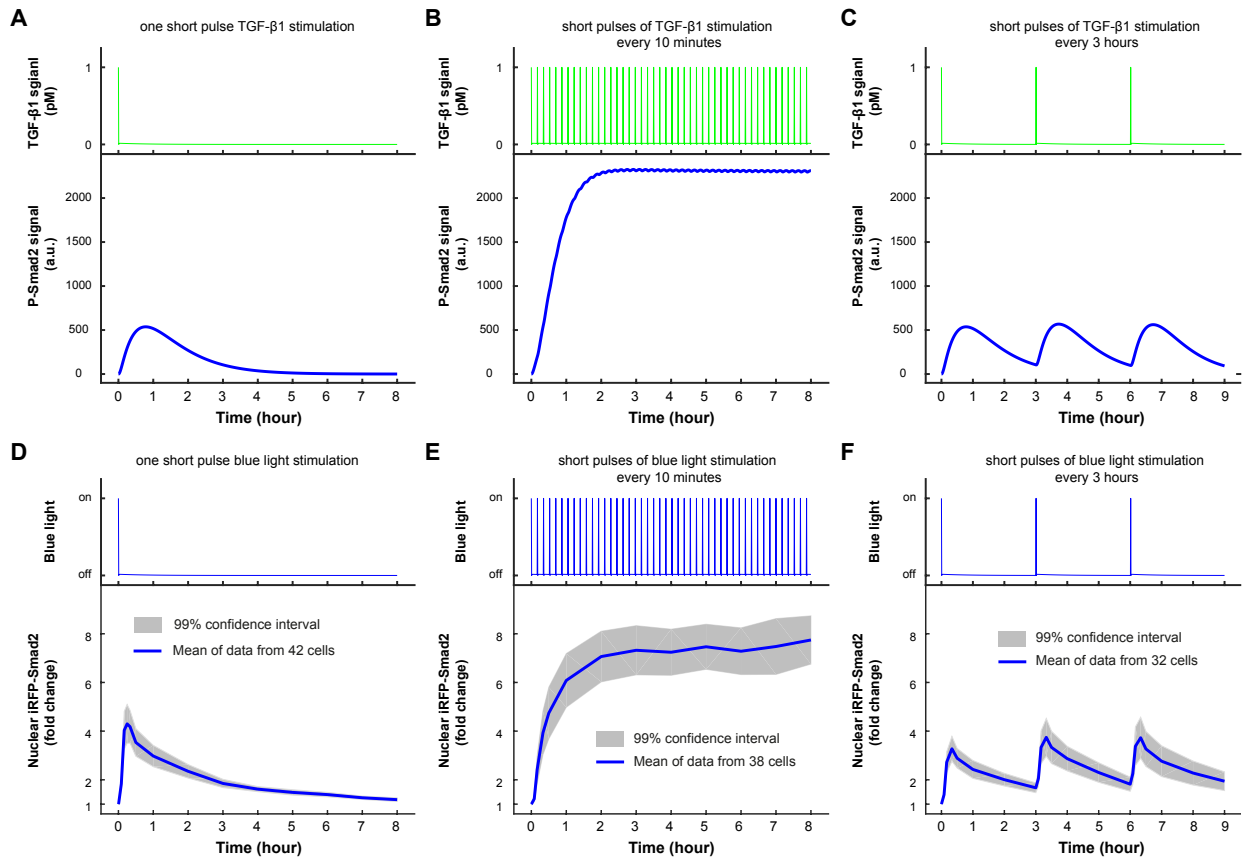

**Figure S5: Dynamics of Smad2 signaling to pulses of TGF- $\beta$  and blue light stimulations.** (A-C) Predicted dynamics of P-Smad2 response to different TGF- $\beta$  pulse stimulations using a published mathematical model (Zi *et al.* Mol Syst Biol, 2011, Reference 32). (D-F) Quantification of Smad2 signaling responses to similar patterns of blue light stimulations in optoTGFBRs-HeLa cells. The 99% confidence interval is based on Student's t-distribution.

**Tables S1:** Summary of initial screen results with different combinations of optoTβRI and optoTβRII constructs

| <b>Combinations of constructs</b>                | <b>Smad2 nuclear translocation upon blue light stimulation</b> | <b>Basal Smad2 signaling without blue light stimulation</b> |
|--------------------------------------------------|----------------------------------------------------------------|-------------------------------------------------------------|
| TβRI-CIBN-mCer<br>TβRII-PHR-mCit                 | No                                                             | No                                                          |
| Myr-cytTβRI -CIBN-mCer<br>Myr-cytTβRII -PHR-mCit | Yes                                                            | High                                                        |
| Myr-cytTβRI-PHR-mCit<br>Myr-cytTβRII-CIBN-mCer   | No                                                             | No                                                          |
| Myr-cytTβRI-PHR-mCit<br>Myr-cytTβRII-PHR-mCit    | Yes                                                            | High                                                        |
| Myr-cytTβRI-CIBN<br>Myr-cytTβRII-PHR             | Yes                                                            | High                                                        |
| cytTβRI-CIBN-mCer<br>cytTβRII-PHR-mCit           | Yes                                                            | High                                                        |
| Myr-cytTβRI-CIBN-mCer<br>cytTβRII-PHR-mCit       | Yes                                                            | Low                                                         |
| cytTβRI-CIBN-mCer<br>Myr-cytTβRII-PHR-mCit       | Yes                                                            | High                                                        |
| cytTβRI-CIBN-mCherry<br>cytTβRII-PHR-mCherry     | Yes                                                            | High                                                        |
| Myr-cytTβRI-CIBN<br>cytTβRII-PHR-mCherry         | Yes                                                            | Low                                                         |
| Myr-CIBN-cytTβRI<br>cytTβRII-PHR-mCherry         | No                                                             | No                                                          |
| cytTβRI-CIBN-mCherry<br>Myr-cytTβRII-PHR         | Yes                                                            | High                                                        |
| Myr-CIBN<br>PHR-cytTβRII-Tdtomto                 | No                                                             | No                                                          |
| Myr-CIBN<br>Tdtomto-PHR-cytTβRII                 | No                                                             | No                                                          |
| Myr-CIBN-cytTβRI<br>PHR-cytTβRII-Tdtomto         | No                                                             | No                                                          |
| Myr-CIBN-cytTβRI<br>Tdtomato-PHR-cytTβRII        | No                                                             | No                                                          |
| Myr-cytTβRI-CIBN<br>Tdtomato-PHR-cytTβRII        | No                                                             | No                                                          |
| Myr-cytTβRI-CIBN<br>PHR-cytTβRII-Tdtomato        | No                                                             | No                                                          |
| Myr-cytTβRI-CIBN<br>cytTβRII-PHR-Tdtomato        | Yes<br>(final selected construct)                              | Low                                                         |
